# Supplementary material for: Reviving BVDT-TTF and EVT-TTF salts
Source: Royal Society of Chemistry journal article supplement (doi:10.1039/d4ma00054d), 2024-01-01
Supplement: d4ma00054d1.pdf [file d4ma00054d1.pdf]

## Supporting Information for

### Reviving BVDT-TTF and EVT-TTF salts

Federica Solano,<sup>1</sup> Pascale Auban-Senzier,<sup>2</sup> Bolesław Barszcz<sup>3</sup>, Arkadiusz Frąckowiak<sup>3</sup>, Iwona Olejniczak<sup>3</sup>, Pere Alemany,<sup>4</sup> Enric Canadell,<sup>\*,5</sup> Nicolas Zigon<sup>\*,1</sup>, Narcis Avarvari<sup>\*,1</sup>

<sup>1</sup> Univ Angers, CNRS, MOLTECH-ANJOU, SFR MATRIX, F-49000 Angers, France. E-mail: [narcis.avarvari@univ-angers.fr](mailto:narcis.avarvari@univ-angers.fr); [nicolas.zigon@univ-angers.fr](mailto:nicolas.zigon@univ-angers.fr)

<sup>2</sup> Université Paris-Saclay, CNRS, UMR 8502, Laboratoire de Physique des Solides, 91405 Orsay, France

<sup>3</sup> Institute of Molecular Physics, Polish Academy of Sciences, Smoluchowskiego 17, 60-179 Poznań, Poland

<sup>4</sup> Departament de Ciència de Materials i Química Física and Institut de Química Teòrica i Computacional (IQTCUB), Universitat de Barcelona, Martí i Franquès 1, 08028 Barcelona, Spain

<sup>5</sup> Institut de Ciència de Materials de Barcelona, ICMAB-CSIC, Campus de la UAB, 08193 Bellaterra, Spain, and Royal Academy of Sciences and Arts of Barcelona, Chemistry Section, La Rambla 115, 08002 Barcelona, Spain. E-mail: [canadell@icmab.es](mailto:canadell@icmab.es)

## SUMMARY

**Table S1.** Crystallographic data, details of data collection and structure refinement parameters.

**Table S2.** Stoichiometry and conductivity of BVDT-TTF, EVT-TTF and BEDT-TTF salts.

**Figure S1.** Temperature dependent resistivity measurement on single crystal for **(BVDT-TTF)<sub>2.5</sub>(I<sub>3</sub>)**.

**Figure S2.** Temperature dependent resistivity measurement on single crystal for **(BVDT-TTF)<sub>2</sub>(ReO<sub>4</sub>)**.

**Figure S3.** Temperature dependent resistivity measurement on single crystal for **(EVT-TTF)(ClO<sub>4</sub>)**.

**Figure S4.** Raman spectrum of **(BVDT-TTF)<sub>2.5</sub>(I<sub>3</sub>)** measured at room temperature with the 632.8 nm excitation line, in the frequency range of the polyiodide stretching vibrations.

**Figure S5.** <sup>1</sup>H NMR (300 MHz, CDCl<sub>3</sub>) of compound **3**.

**Figure S6.** <sup>13</sup>C NMR (76 MHz, CDCl<sub>3</sub>) of compound **3**.

**Figure S7.** <sup>1</sup>H NMR (300 MHz, CDCl<sub>3</sub>) of compound **4**.

**Figure S8.** <sup>13</sup>C NMR (76 MHz, CDCl<sub>3</sub>) of compound **4**.

**Figure S9.** <sup>1</sup>H NMR (300 MHz, CDCl<sub>3</sub>) of compound **BVDT-TTF**.

**Figure S10.** <sup>1</sup>H NMR (300 MHz, CDCl<sub>3</sub>) of compound **EVT-TTF**.

**Figure S11.** <sup>13</sup>C NMR (126 MHz, DMSO-d<sub>6</sub>) of compound **EVT-TTF**.

**Figure S12.** MS (MALDI-TOF) of compound **BVDT-TTF**.

**Figure S13.** MS (MALDI-TOF) of compound **4**.

**Figure S14.** MS (MALDI-TOF) of compound **EVT-TTF**.

**Figure S15.** MS (MALDI-TOF) of compound **3**.

**Table S1** Crystallographic data, details of data collection and structure refinement parameters.

|                                                                                                             | (BVDI-TTF)(TaF <sub>6</sub> )                                    | (BVDI-TTF) <sub>2.5</sub> (I <sub>3</sub> )                      | (BVDI-TTF) <sub>2</sub> (ReO <sub>4</sub> )                                        | (EVI-TTF)(ClO <sub>4</sub> )                                                                                         |
|-------------------------------------------------------------------------------------------------------------|------------------------------------------------------------------|------------------------------------------------------------------|------------------------------------------------------------------------------------|----------------------------------------------------------------------------------------------------------------------|
| Formula sum                                                                                                 | C <sub>10</sub> H <sub>4</sub> S <sub>8</sub> , TaF <sub>6</sub> | C <sub>10</sub> H <sub>4</sub> S <sub>8</sub> , I <sub>2.5</sub> | C <sub>10</sub> H <sub>4</sub> S <sub>8</sub> , (ClO <sub>4</sub> ) <sub>0.5</sub> | C <sub>10</sub> H <sub>6</sub> S <sub>8</sub> , (CH <sub>2</sub> Cl <sub>2</sub> ) <sub>0.5</sub> , ClO <sub>4</sub> |
| Formula weight                                                                                              | 675.56                                                           | 532.89                                                           | 505.71                                                                             | 524.54                                                                                                               |
| Crystal system                                                                                              | orthorhombic                                                     | orthorhombic                                                     | monoclinic                                                                         | monoclinic                                                                                                           |
| Space group                                                                                                 | <i>Pn</i> nm                                                     | <i>P</i> nma                                                     | <i>C</i> 2/m                                                                       | <i>P</i> 2 <sub>1</sub> /c                                                                                           |
| <i>a</i> /Å                                                                                                 | 4.8259(3)                                                        | 3.777(19)                                                        | 33.133(3)                                                                          | 8.0005(4)                                                                                                            |
| <i>b</i> /Å                                                                                                 | 17.8935(9)                                                       | 12.18(14)                                                        | 12.1739(14)                                                                        | 23.8718(10)                                                                                                          |
| <i>c</i> /Å                                                                                                 | 10.1805(5)                                                       | 33.1(9)                                                          | 3.8263(6)                                                                          | 9.8100(5)                                                                                                            |
| <i>α</i> /°                                                                                                 | 90                                                               | 90                                                               | 90                                                                                 | 90                                                                                                                   |
| <i>β</i> /°                                                                                                 | 90                                                               | 90                                                               | 93.360(11)                                                                         | 100.649(5)                                                                                                           |
| <i>γ</i> /°                                                                                                 | 90                                                               | 90                                                               | 90                                                                                 | 90                                                                                                                   |
| <i>V</i> /Å <sup>3</sup>                                                                                    | 879.11(8)                                                        | 1523(46)                                                         | 1540.7(3)                                                                          | 1841.31(16)                                                                                                          |
| <i>Z</i>                                                                                                    | 2                                                                | 4                                                                | 4                                                                                  | 4                                                                                                                    |
| <i>D<sub>c</sub></i> /g cm <sup>-3</sup>                                                                    | 2.552                                                            | 2.324                                                            | 2.180                                                                              | 1.892                                                                                                                |
| <i>T</i> /K                                                                                                 | 200                                                              | 200                                                              | 200                                                                                | 297                                                                                                                  |
| <i>μ</i> /mm <sup>-1</sup>                                                                                  | 20.964                                                           | 29.814                                                           | 18.139                                                                             | 11.819                                                                                                               |
| Reflections collected                                                                                       | 883                                                              | 1518                                                             | 1714                                                                               | 6003                                                                                                                 |
| Independent reflection                                                                                      | 826                                                              | 1207                                                             | 1035                                                                               | 2614                                                                                                                 |
| final <i>R</i> <sub>1</sub> <sup>a</sup> , <i>wR</i> <sub>2</sub> <sup>b</sup> [ <i>I</i> > 2σ( <i>I</i> )] | 0.0393/0.1129                                                    | 0.0795/0.2430                                                    | 0.1192/0.3454                                                                      | 0.0570/0.1564                                                                                                        |
| <i>R</i> <sub>1</sub> <sup>a</sup> , <i>wR</i> <sub>2</sub> <sup>b</sup> (all data)                         | 0.0408/0.1141                                                    | 0.0943/0.2540                                                    | 0.1249/0.3489                                                                      | 0.0646/0.1653                                                                                                        |
| goodness-of-fit on <i>F</i> <sup>2</sup>                                                                    | 1.099                                                            | 1.131                                                            | 1.097                                                                              | 1.055                                                                                                                |
| Δρ <sub>min</sub> /Δρ <sub>max</sub> (e Å <sup>-3</sup> )                                                   | -1.305/2.169                                                     | -0.755/1.261                                                     | -0.971/1.102                                                                       | -0.938/0.984                                                                                                         |
| Completeness (%)                                                                                            | 99.2                                                             | 98.4                                                             | 81.0                                                                               | 94.1                                                                                                                 |
| CCDC number                                                                                                 | 2296888-                                                         | 2296889-                                                         | 2296890-                                                                           | 2296891-                                                                                                             |

<sup>a</sup>*R*<sub>1</sub> = Σ||*F*<sub>o</sub>| - |*F*<sub>c</sub>|| / Σ|*F*<sub>o</sub>|. <sup>b</sup>*wR*<sub>2</sub> = [Σ*w*(*F*<sub>o</sub><sup>2</sup> - *F*<sub>c</sub><sup>2</sup>)<sup>2</sup> / Σ*w*(*F*<sub>o</sub><sup>2</sup>)<sup>2</sup>]<sup>1/2</sup>; *w* = 1/[σ<sup>2</sup>(*F*<sub>o</sub><sup>2</sup>) + (*aP*)<sup>2</sup> + *bP*] where *P* = [max(*F*<sub>o</sub><sup>2</sup>, 0) + 2*F*<sub>c</sub><sup>2</sup>]/3.

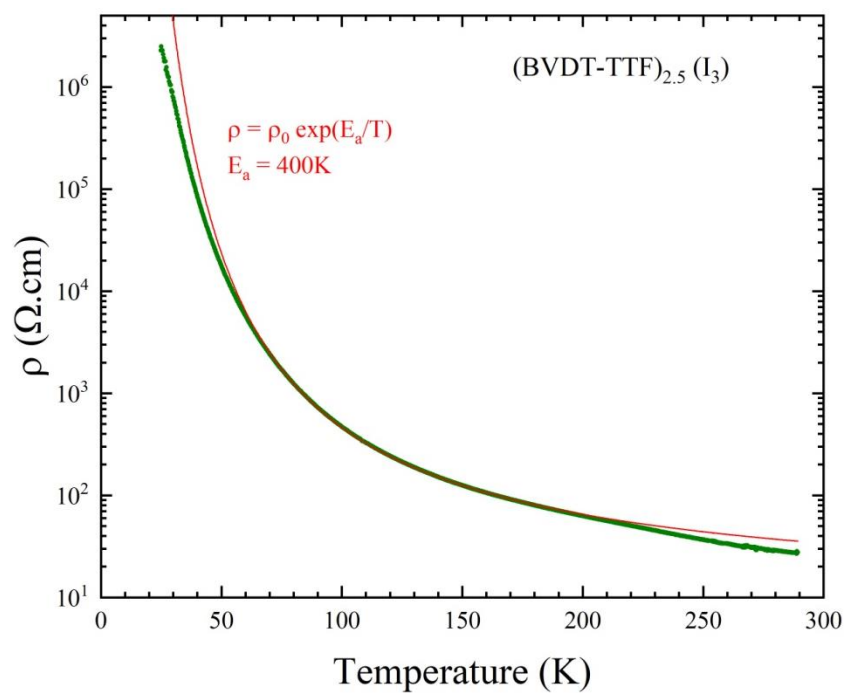

**Fig. S1** Temperature dependent resistivity measurement on single crystal for **(BVDT-TTF)<sub>2.5</sub>(I<sub>3</sub>)**.

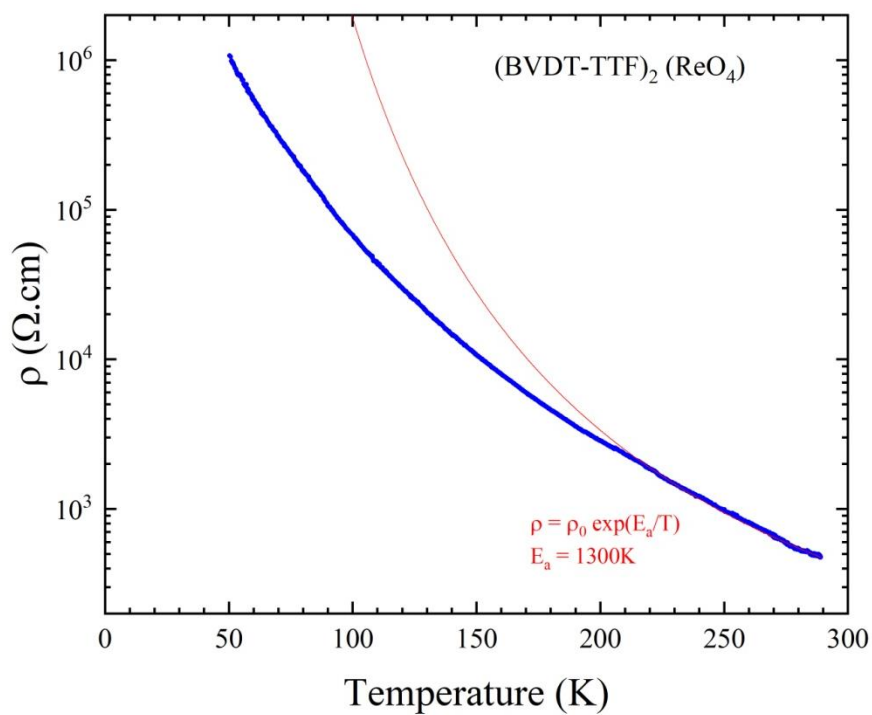

**Fig. S2** Temperature dependent resistivity measurement on single crystal for **(BVDT-TTF)<sub>2</sub>(ReO<sub>4</sub>)**.

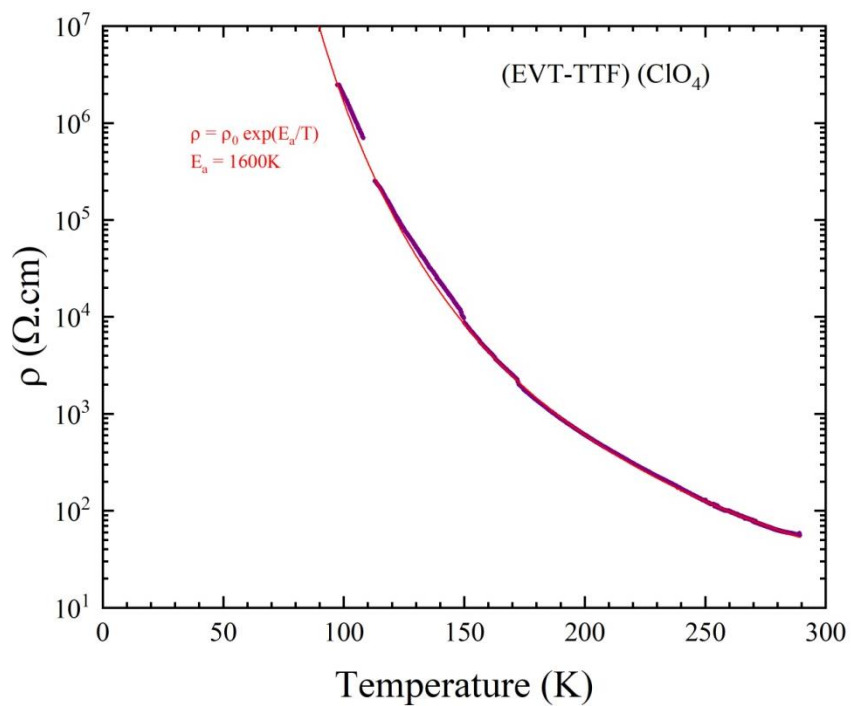

**Fig. S3** Temperature dependent resistivity measurement on single crystal for (EVT-TTF)(ClO<sub>4</sub>).

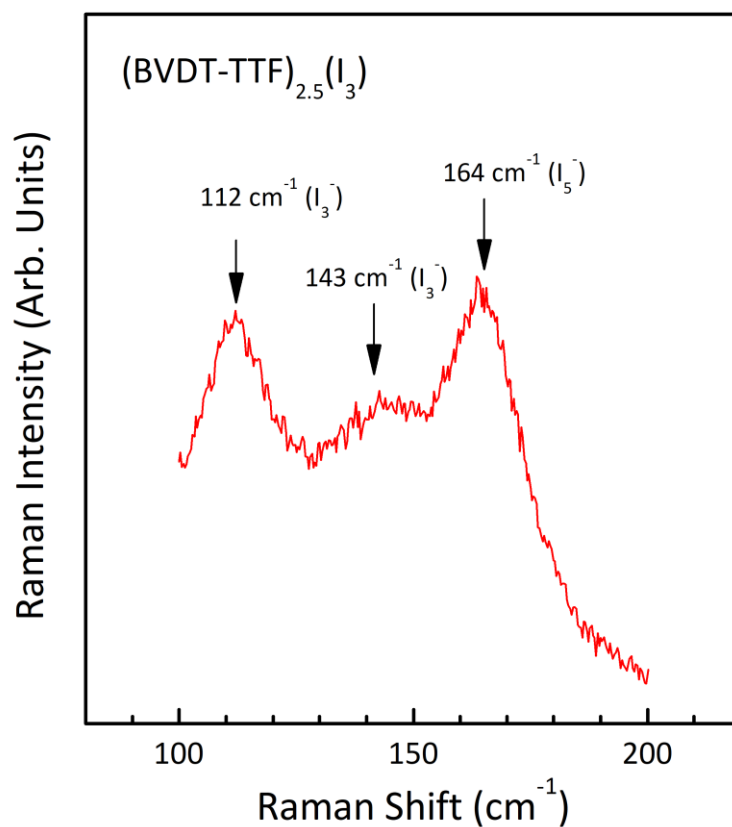

**Fig. S4** Raman spectrum of  $(\text{BVDT-TTF})_{2.5}(\text{I}_3)$  measured at room temperature with the 632.8 nm excitation line, in the frequency range of the polyiodide stretching vibrations.

The Raman spectrum of  $(\text{BVDT-TTF})_{2.5}(\text{I}_3)$  in the frequency range of the stretching polyiodide modes reveals three distinct modes:

- the symmetric stretching of the centrosymmetric triiodide anion at  $112 \text{ cm}^{-1}$ ,
- the asymmetric stretching mode of the asymmetric triiodide ion at  $143 \text{ cm}^{-1}$ ,
- the band at  $164 \text{ cm}^{-1}$ , which is most likely related to the symmetric stretching of the L-shaped pentaiodide present in the structure.<sup>1,2</sup>

**Table S2** Stoichiometry and conductivity of BVDT-TTF, EVT-TTF and BEDT-TTF salts.

| Donor                          | Anion            | Stoichiometry | Single crystal conductivity<br>( $\text{S}\cdot\text{cm}^{-1}$ , 290K) |
|--------------------------------|------------------|---------------|------------------------------------------------------------------------|
| BVDT-TTF                       | $\text{TaF}_6^-$ | 1 : 1         | $4.4\cdot 10^{-2}$                                                     |
| BVDT-TTF                       | $\text{I}_3^-$   | 2.5 : 1       | $1.4\cdot 10^{-1}$                                                     |
| BVDT-TTF                       | $\text{ReO}_4^-$ | 2 : 1         | $3.1\cdot 10^{-3}$                                                     |
| EVT-TTF                        | $\text{ClO}_4^-$ | 1 : 1         | $1.8\cdot 10^{-2}$                                                     |
| BEDT-TTF <sup>3</sup>          | $\text{TaF}_6^-$ | 1 : 1         | $5\cdot 10^{-4}$                                                       |
| $\beta$ -BEDT-TTF <sup>4</sup> | $\text{I}_3^-$   | 2 : 1         | 20                                                                     |
| BEDT-TTF <sup>5</sup>          | $\text{ReO}_4^-$ | 2 : 1         | $5\cdot 10^{-3}$                                                       |
| BEDT-TTF <sup>6</sup>          | $\text{ClO}_4^-$ | 2 : 1         | 26.31                                                                  |

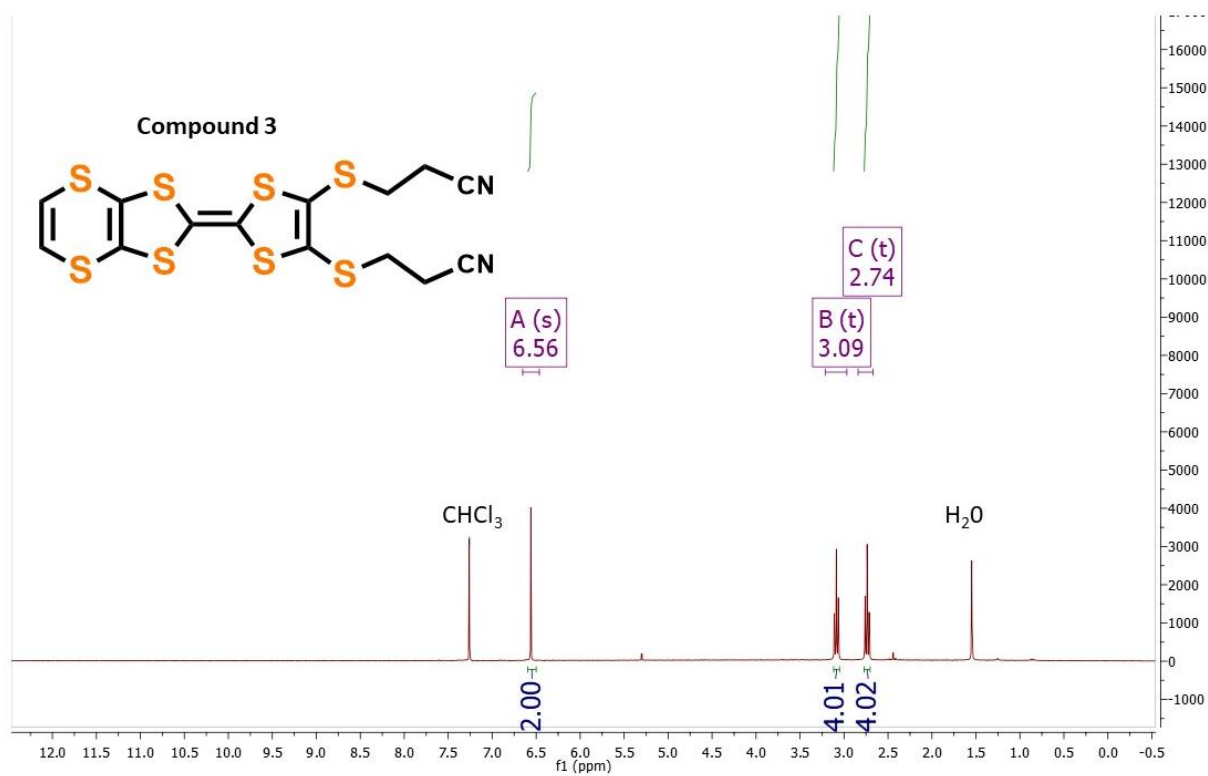

Fig. S5 <sup>1</sup>H NMR (300 MHz, CDCl<sub>3</sub>) of compound 3.

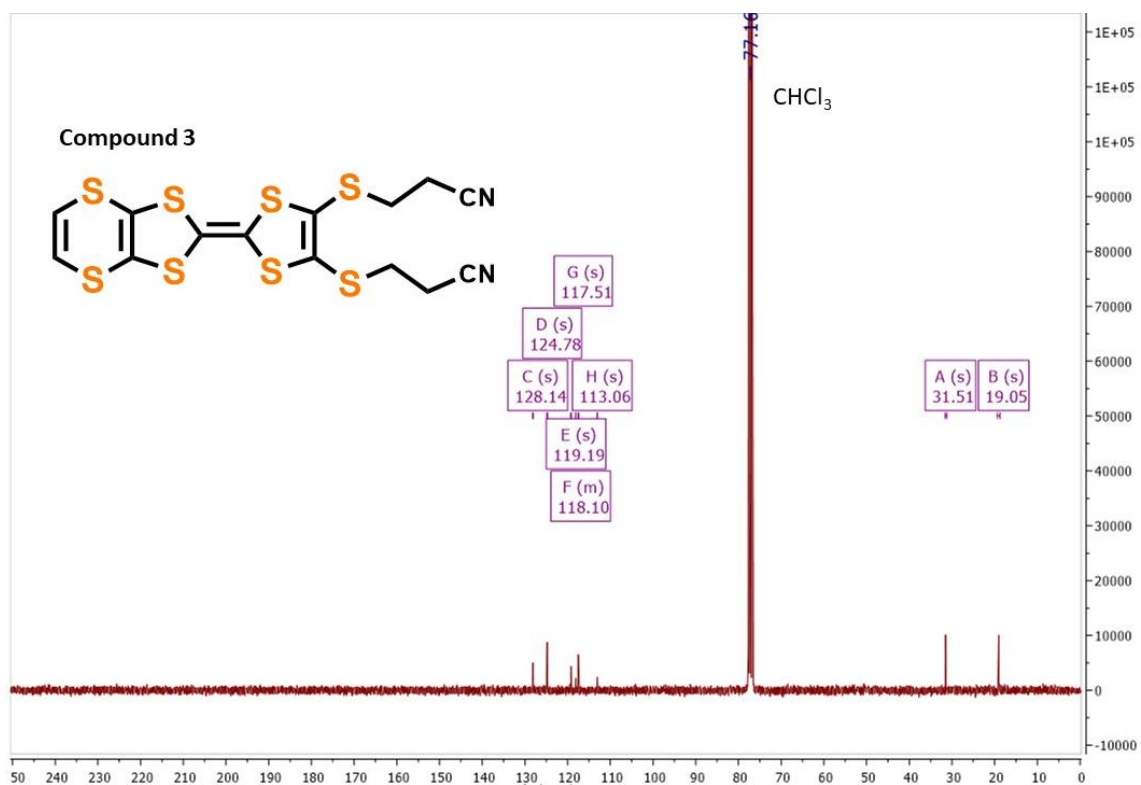

Fig. S6 <sup>13</sup>C NMR (76 MHz, CDCl<sub>3</sub>) of compound 3.



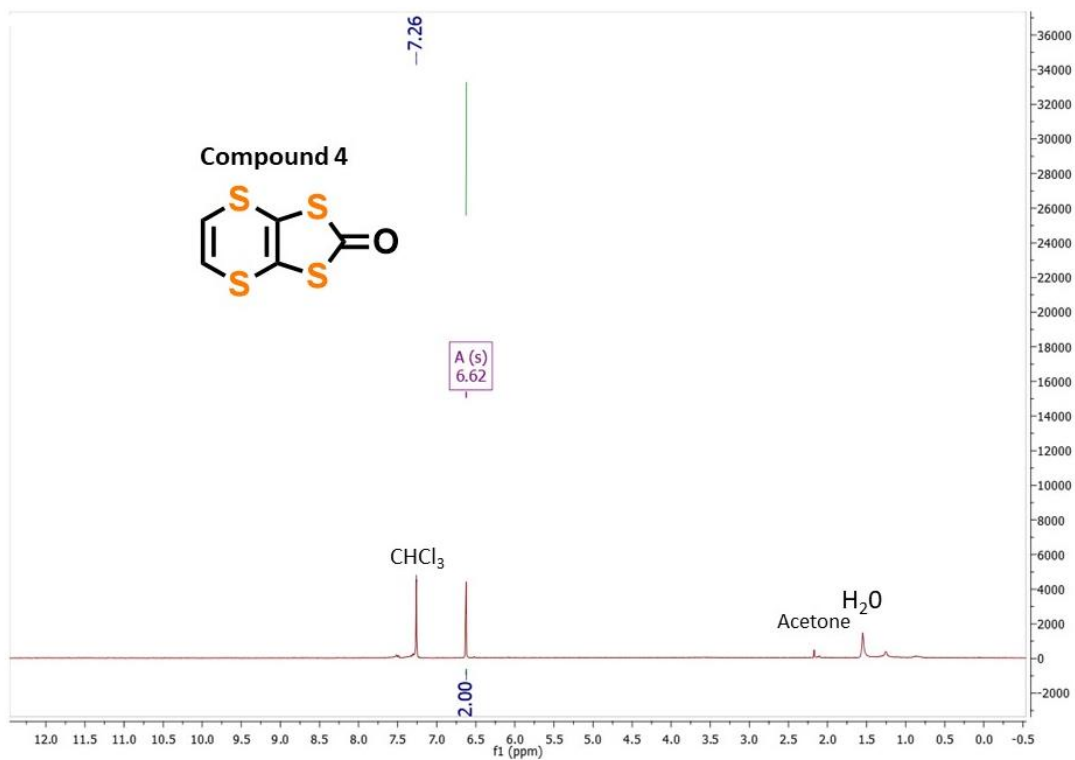

Fig. S7 <sup>1</sup>H NMR (300 MHz, CDCl<sub>3</sub>) of compound 4.

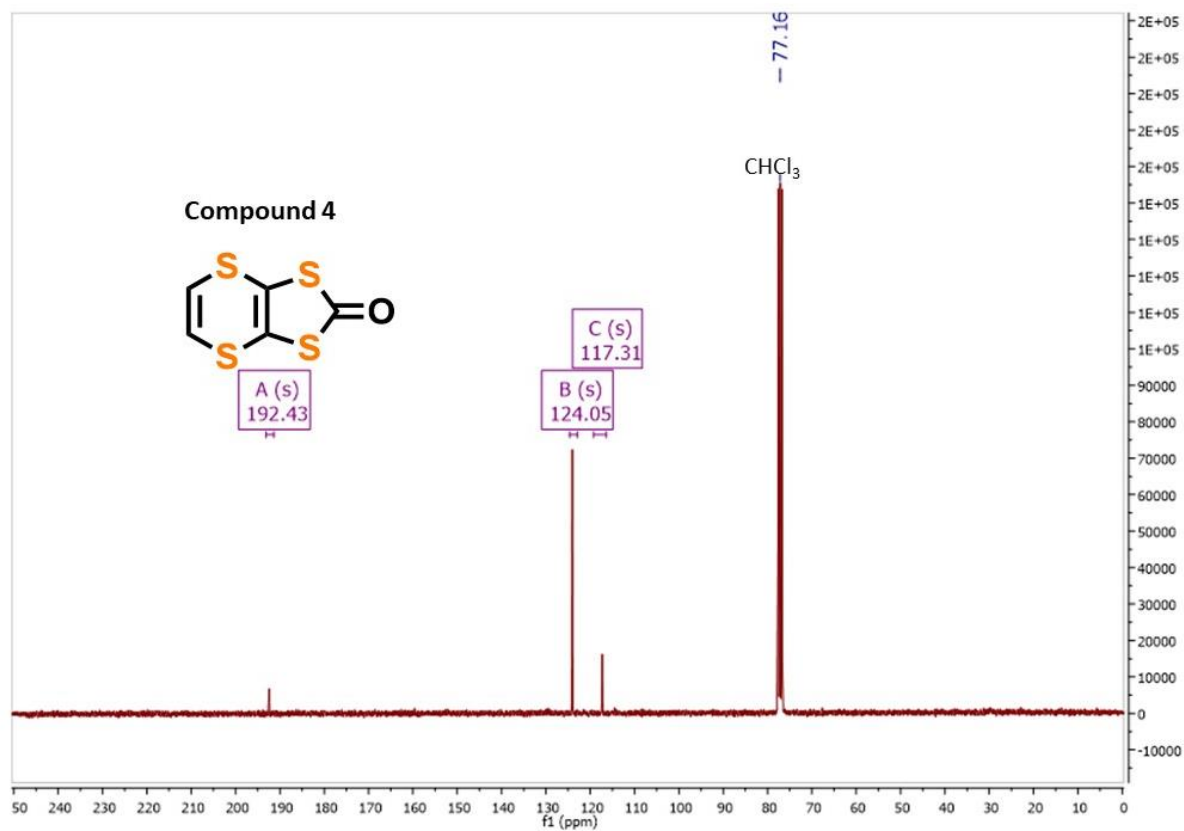

Fig. S8 <sup>13</sup>C NMR (76 MHz, CDCl<sub>3</sub>) of compound 4.

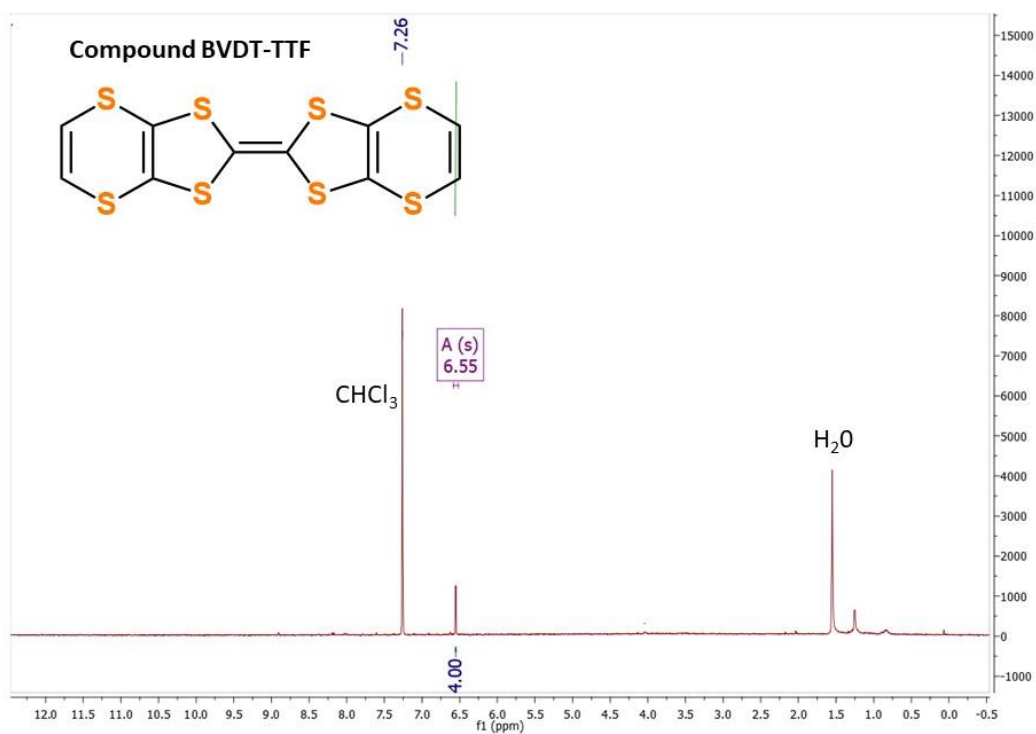

**Fig. S9** <sup>1</sup>H NMR (300 MHz, CDCl<sub>3</sub>) of **BVDT-TTF**.

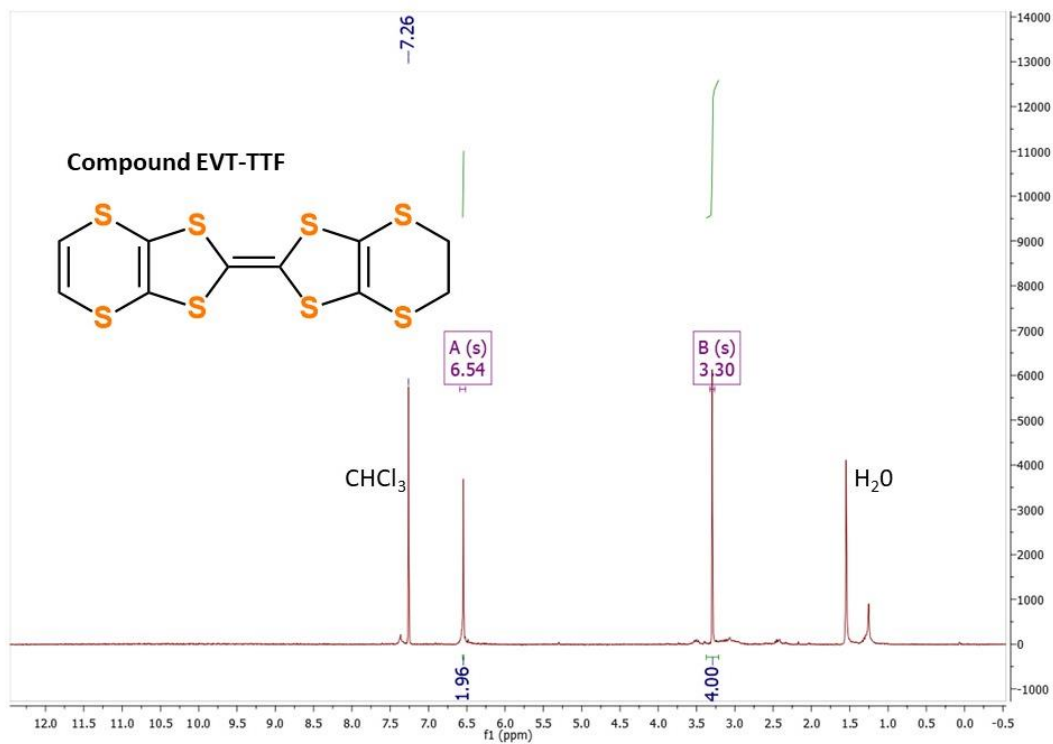

**Fig. S10** <sup>1</sup>H NMR (300 MHz, CDCl<sub>3</sub>) of **EVT-TTF**.

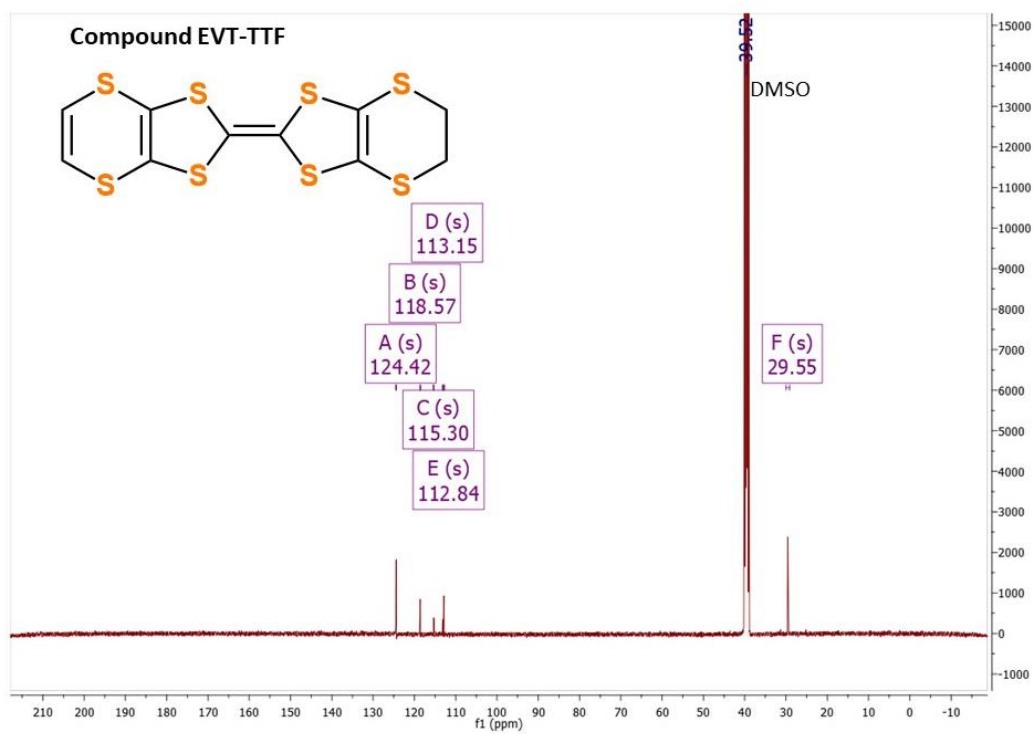

**Fig. S11**  $^{13}\text{C}$  NMR (126 MHz,  $\text{DMSO-d}_6$ ) of **EVT-TTF**.

Mass spectrum:

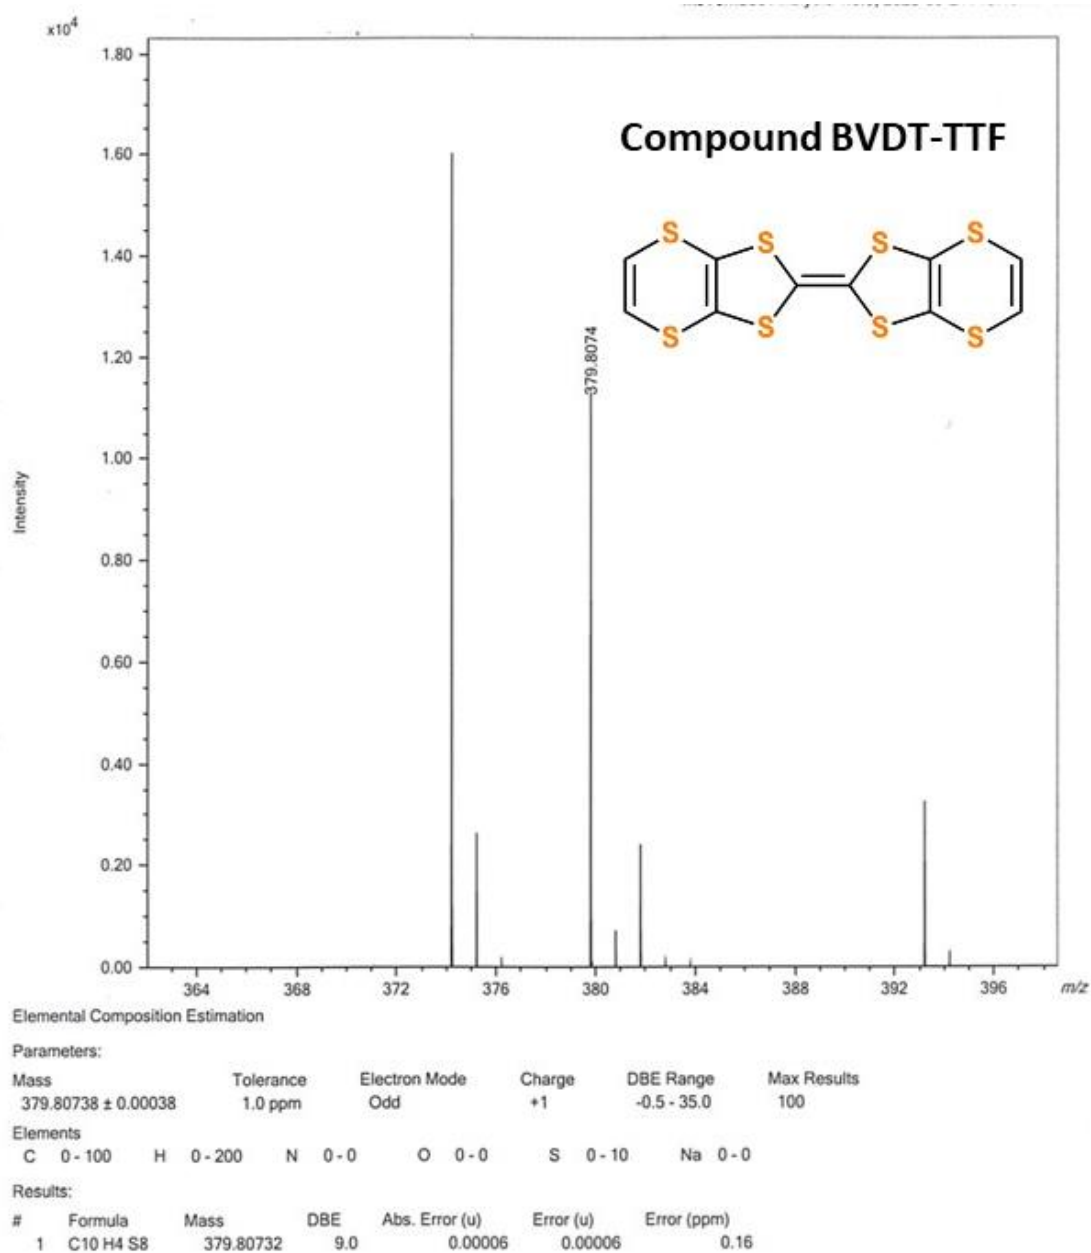

Fig. S12 MS (MALDI-TOF) of BVDT-TTF.

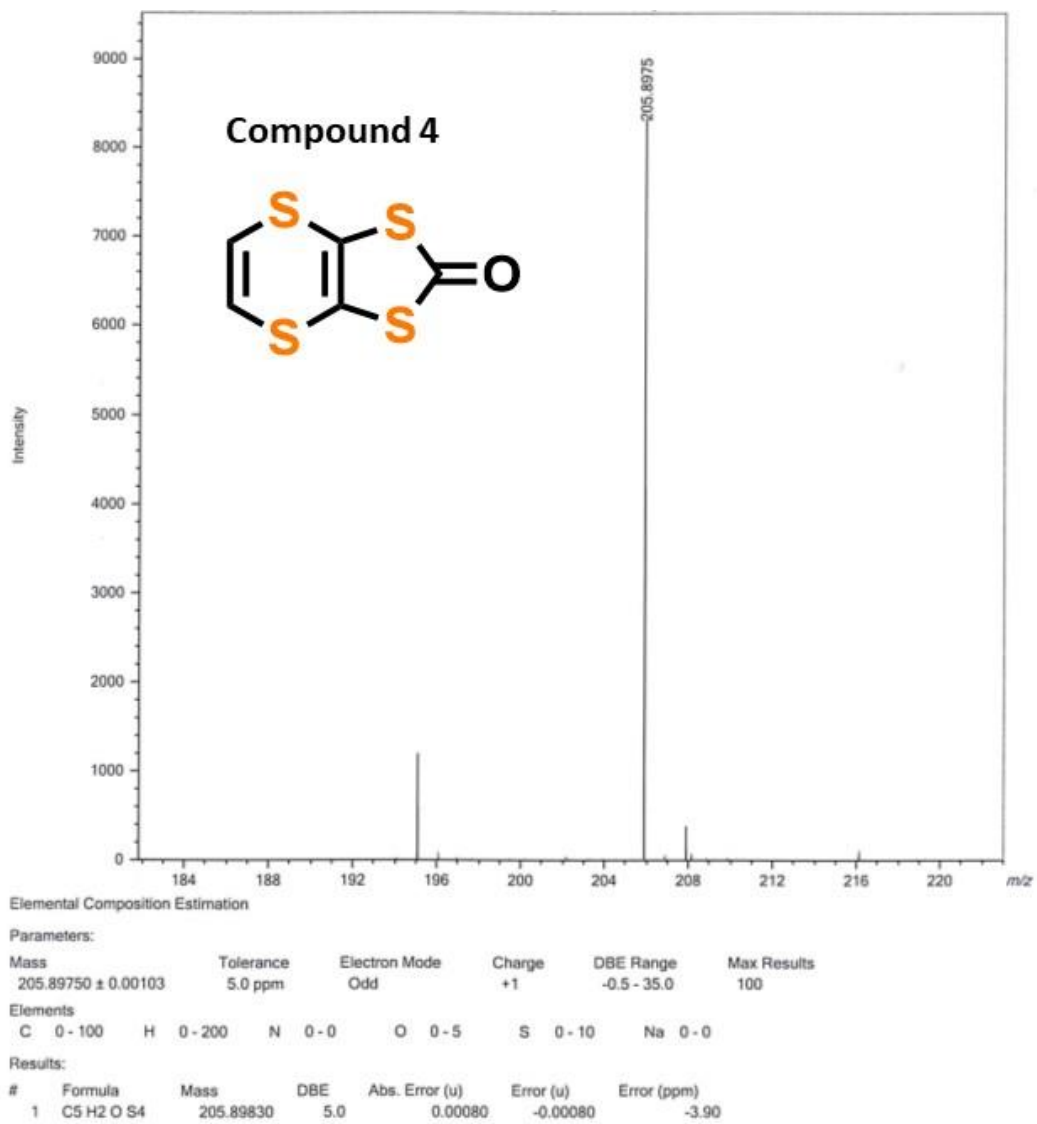

**Fig. S13** MS (MALDI-TOF) of compound **4**.

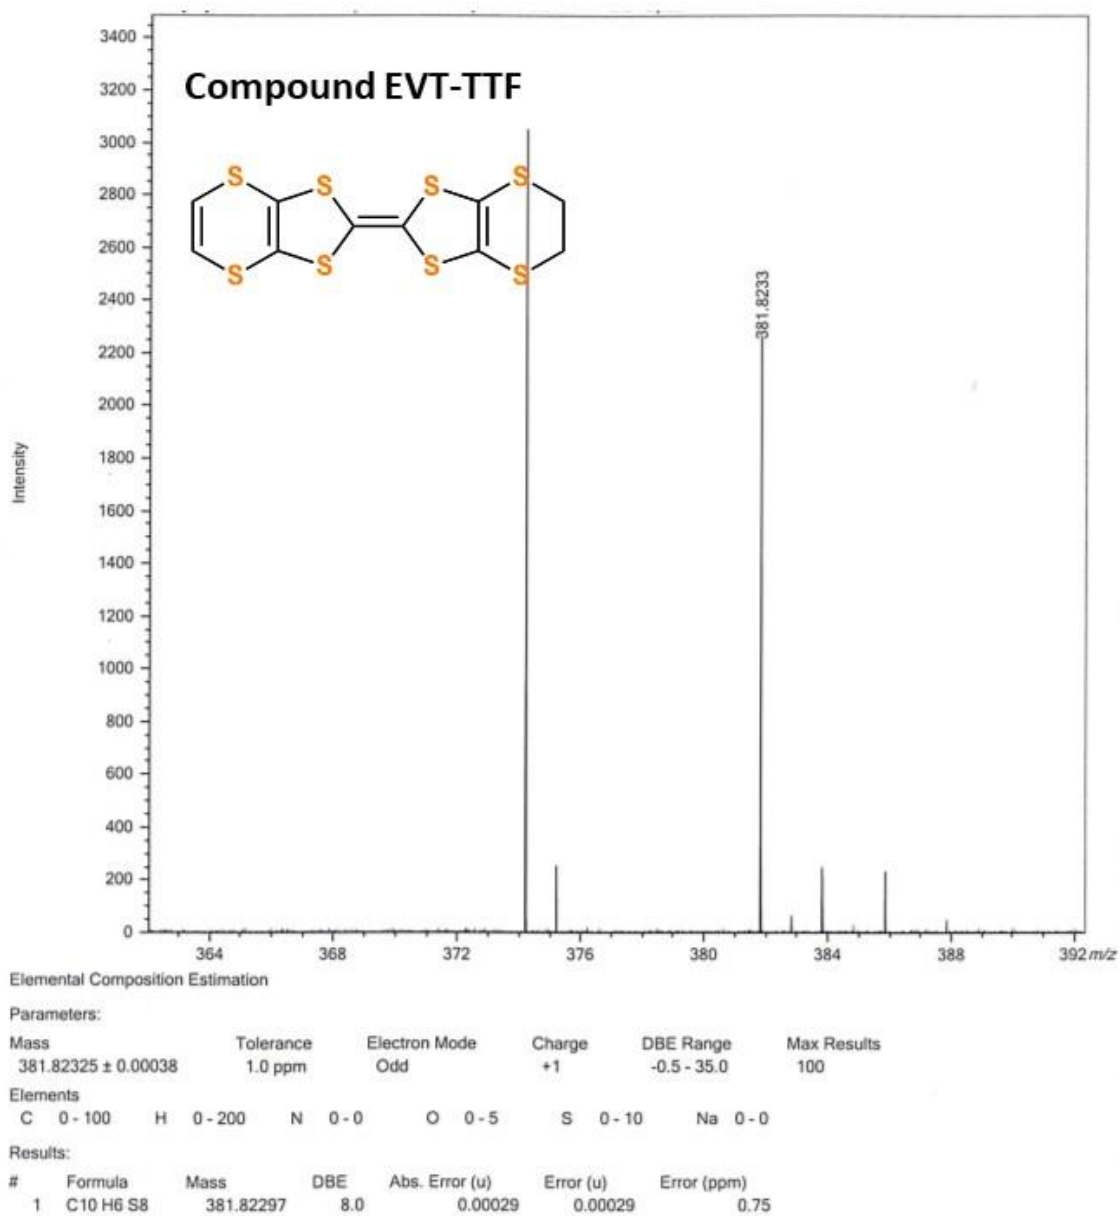

**Fig. S14** MS (MALDI-TOF) of EVT-TTF.

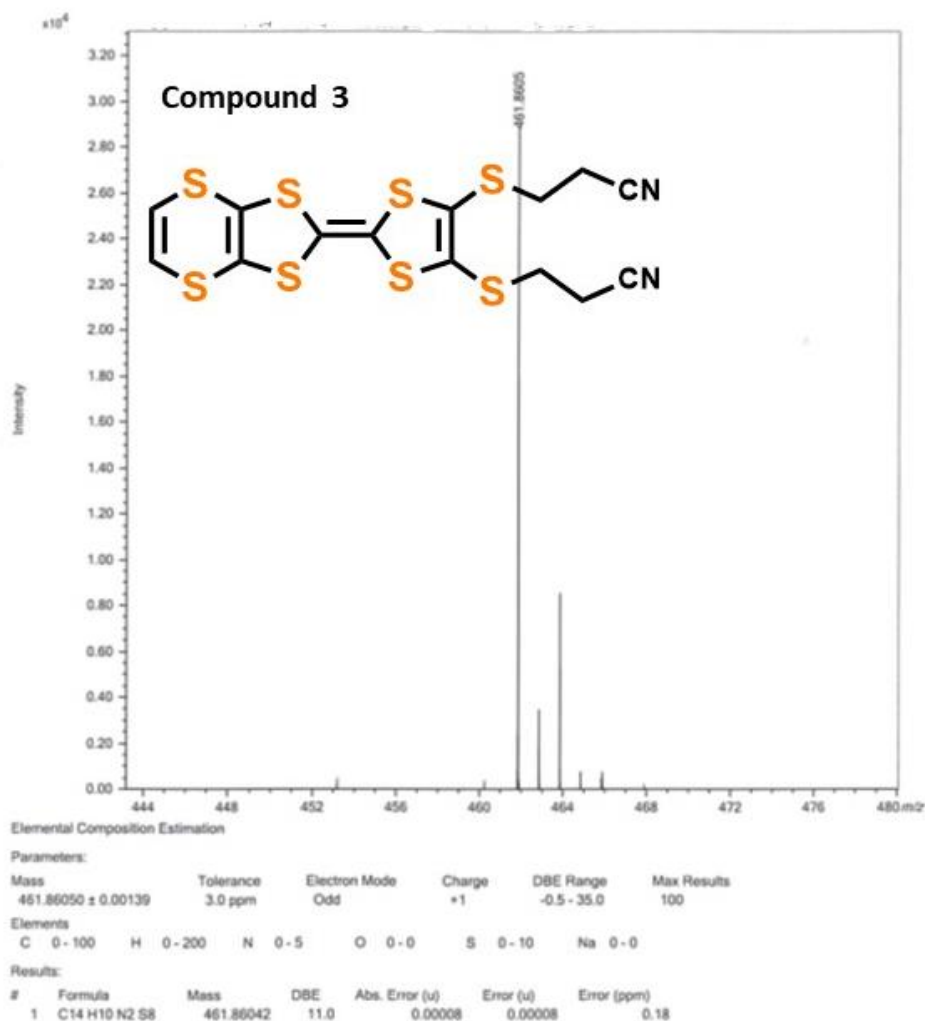

**Fig. S15** MS (MALDI-TOF) of compound **3**.

## References

- 1 P. H. Svensson and L. Kloo, *Chem. Rev.*, 2003, **103**, 1649–1684.
- 2 I. Jerman, V. Jovanovski, A. Šurca Vuk, S. B. Hočevnar, M. Gaberšček, A. Jesih and B. Orel, *Electrochim Acta*, 2008, **53**, 2281–2288.
- 3 M. Allain, C. Mézière, P. Auban-Senzier and N. Avarvari, *Crystals*, 2021, **11**, 386.
- 4 L. I. Buravov, M. V. Kartsovnik, V. F. Kaminskii, P. A. Kononovich, E. E. Kostuchenko, V. N. Laukhin, M. K. Makova, S. I. Pesotskii, V. N. Topnikov and E. B. Yagubskii, .
- 5 S. S. P. Parkin, E. M. Engler, R. R. Schumaker, R. Lagier, V. Y. Lee, J. C. Scott and R. L. Greene, *Phys. Rev. Lett.*, 1983, **50**, 270–273.
- 6 G. Saito, T. Enoki, K. Toriumi and H. Inokuchi, *Solid State Commun.*, 1982, **42**, 557–560.
